# Supplementary material
Source: PubMed Central journal article supplement (PMC5373050)
Supplement: supp_pp.16.01610_PP2016-01610R2_Supplemental_Table_S1.pdf [file supp_pp.16.01610_PP2016-01610R2_Supplemental_Table_S1.pdf]

**Supplemental Table S1.** Accessions of cultivated soybeans and wild soybeans used in this study.

| Cultivated soybean |          |          | Wild soybean |        |        |
|--------------------|----------|----------|--------------|--------|--------|
| DN44               | 06-198   | KF25     | ZYD1         | ZYD3   | ZYD7   |
| S04-5147           | HN48     | SN26     | ZYD8         | ZYD10  | ZYD23  |
| NF19               | HN64     | L05-277  | ZYD55        | ZYD84  | ZYD85  |
| LD3                | HF47     | HN57     | ZYD97        | ZYD99  | ZYD111 |
| BD5                | DN48     | HF25     | ZYD113       | ZYD118 | ZYD125 |
| HH38               | HN38     | HN53     | ZYD132       | ZYD133 | ZYD195 |
| KX7                | KD25     | K04-8586 | ZYD203       | ZYD222 | ZYD240 |
| KD18               | KF10     | K02-728  | ZYD289       | ZYD330 | ZYD385 |
| KF11               | KF21     | K03-710  | ZYD386       | ZYD402 | ZYD410 |
| KN26               | SN14     | K05-2782 | ZYD418       | ZYD424 | ZYD426 |
| NF18               | SN10     | LP10-383 | ZYD484       | ZYD486 | ZYD507 |
| SN28               | SN30     | SN22     | ZYD537       | ZYD546 | ZYD601 |
| S05-7418           | 2012J-74 | 2012J-66 | ZYD603       | ZYD607 | ZYD637 |
| 2012J-58           | 2012J-21 | 2012J-20 | ZYD647       | ZYD666 | ZYD667 |
| 2012X-46           | 2012J-5  | 2012X-47 | ZYD669       | ZYD676 | ZYD686 |
| 2012J-145          | 198ZS    | HN44     | ZYD694       | ZYD696 | ZYD721 |
|                    |          |          | ZYD731       | ZYD732 | ZYD733 |
