# Supplementary material
Source: PubMed Central journal article supplement (PMC5373050)
Supplement: supp_pp.16.01610_PP2016-01610R2_Supplemental_Table_S3.pdf [file supp_pp.16.01610_PP2016-01610R2_Supplemental_Table_S3.pdf]

**Supplemental Table S3.** Quantitative traits loci for seed oil overlapped with downstream genes of *GmZF351* in soybean.

| Gene loci            | QTL name      | QTL position     |                  |
|----------------------|---------------|------------------|------------------|
|                      |               | 5'               | 3'               |
| <i>Glyma19g03530</i> | Seed oil 37-6 | Chr19:1634051 bp | Chr19:7155336 bp |
| <i>Glyma13g16560</i> | Seed oil 36-4 | Chr13:1346712 bp | Chr13:1916503 bp |
