# Supplementary material
Source: PubMed Central journal article supplement (PMC5373050)
Supplement: supp_pp.16.01610_PP2016-01610R2_Supplemental_Table_S4.pdf [file supp_pp.16.01610_PP2016-01610R2_Supplemental_Table_S4.pdf]

**Supplemental Table S4.** Primers used in this work.

| <b>Primer Name</b>                     | <b>Primer Sequences</b>                         |
|----------------------------------------|-------------------------------------------------|
| <b>Primers for selection detection</b> |                                                 |
| <i>GmZF351-F</i>                       | TCACCTTGATGCAAAGGGATT                           |
| <i>GmZF351-R</i>                       | AACAATAACAATAACAATAGAAGACA                      |
| <b>Primers for constructs</b>          |                                                 |
| <i>GmZF351-PCR8-F</i>                  | ATGAGTAGTGTTTTTTCAGAACA                         |
| <i>GmZF351-PCR8-R</i>                  | CATCAGCAATTCATTCCACC                            |
| <i>GmZF351-pBD-F</i>                   | GGATCCATGAGTAGTGTTTTTTCAGAA                     |
| <i>GmZF351-pBD-R</i>                   | AAGCTTCATCAGCAATTCATTCCACC                      |
| <i>pBCCP2-LUC-F</i>                    | GCTCTAATGTAGTACCAATCAGGG                        |
| <i>pBCCP2-LUC-R</i>                    | TGTTGAGACAGTGGACGATGAA                          |
| <i>pKASIII-LUC-F</i>                   | CTCTAATAAAGCGTCGTAAGGG                          |
| <i>pKASIII-LUC-R</i>                   | TTGATTGTTGATAATAGAGGAACA                        |
| <i>pTAG1-LUC-F</i>                     | AATTGCCAGTCAAAAACCATGA                          |
| <i>pTAG1-LUC-R</i>                     | TTCGAAAAGCGTTTGACGAAA                           |
| <i>pOLEO2-LUC-F</i>                    | GACTTTGACTTGTTAAGGAAACA                         |
| <i>pOLEO2-LUC-R</i>                    | TGTAAGCTAATGAGAAATTGTTTT                        |
| <i>pWRI1-LUC-F</i>                     | TACGATATGTTTCGGATTGACA                          |
| <i>pWRI1-LUC-R</i>                     | CTATGTCTGCAAATCCCACA                            |
| <i>pPK<math>\alpha</math>-LUC-F</i>    | TAGCCACGACGCCAAAGACGAA                          |
| <i>pPK<math>\alpha</math>-LUC-R</i>    | GGTTTCGCCGGCGACGGA                              |
| <i>pPK<math>\beta</math>1-LUC-F</i>    | TTTCTGAATCGGAGATACATCA                          |
| <i>pPK<math>\beta</math>1-LUC-R</i>    | TTCTGATTTTGAAGAGAAGGAA                          |
| <i>Glyma08g24420-LUC-F</i>             | GCTATGACCATGATTACGAAGGCAGTGATTACTATGTGATGAT     |
| <i>Glyma08g24420-LUC-R</i>             | CTTTATGTTTTTGGCGTCTTCCATTTGGAGCCTCTGTCTCAATC    |
| <i>Glyma15g34770-LUC-F</i>             | GCTATGACCATGATTACGAACTATTCCCACCCCTAATTGTCAA     |
| <i>Glyma15g34770-LUC-R</i>             | CTTTATGTTTTTGGCGTCTTCCATTTGGGGGCCTCTATCTTCA     |
| <i>Glyma19g03530-LUC-F</i>             | GCTATGACCATGATTACGAAGCTTACAATCAGGGCAGGTTCAA     |
| <i>Glyma19g03530-LUC-R</i>             | CTTTATGTTTTTGGCGTCTTCCATTTGCAAACCAACCCACGA      |
| <i>Glyma15g00550-LUC-F</i>             | GCTATGACCATGATTACGAACCAGAATAGTCCAGACATCTTAT     |
| <i>Glyma15g00550-LUC-R</i>             | CTTTATGTTTTTGGCGTCTTCCATTTACAACAAACCAAGTCAAATAC |
| <i>Glyma13g16560-LUC-F</i>             | GCTATGACCATGATTACGAATGATAATAGCACAGAAAAAGGGAT    |
| <i>Glyma13g16560-LUC-R</i>             | CTTTATGTTTTTGGCGTCTTCCATTGGAAAAGAAGACCGAGCG     |
| <i>Glyma17g06120-LUC-F</i>             | GCTATGACCATGATTACGAACAGTCATCACCCCTTCTACGCTT     |
| <i>Glyma17g06120-LUC-R</i>             | CTTTATGTTTTTGGCGTCTTCCATTGGAGAAGAAGACCGAGCGT    |
| <i>Glyma19g13060-LUC-F</i>             | GCTATGACCATGATTACGAACACGGATACATTTTGACTGATTG     |
| <i>Glyma19g13060-LUC-R</i>             | CTTTATGTTTTTGGCGTCTTCCATGGTTGAAGGTGAAGTTTAGGGT  |
| <i>Glyma16g07800-LUC-F</i>             | GCTATGACCATGATTACGAACCTTGCATAGATAACAACTCAAG     |
| <i>Glyma16g07800-LUC-R</i>             | CTTTATGTTTTTGGCGTCTTCCATGGTTGAAGGTGAAGTTTAGGG   |
| <i>Glyma09g41380-LUC-F</i>             | GCTATGACCATGATTACGAAATATCTTATTTGCTGATGAAGTCA    |
| <i>Glyma09g41380-LUC-R</i>             | CTTTATGTTTTTGGCGTCTTCCATTTACAAGAAGAAGAGGAAGAAG  |

---

|                            |                                             |
|----------------------------|---------------------------------------------|
| <i>Glyma18g44350-LUC-F</i> | GCTATGACCATGATTACGAATAGCACACACTTTCTTACTCT   |
| <i>Glyma18g44350-LUC-R</i> | CTTTATGTTTTTGGCGTCTTCCATTTACAAGAAGAACAACAAC |
| <i>pGmZF351-3K-F</i>       | TCACCTTGATGCAAAGGGATT                       |
| <i>pGmZF351-3K-R</i>       | CTTTTTTTTTTTGTGTGTGTGTAG                    |
| <i>pGmZF351-1K-F</i>       | CAATAAATAAATTTTAAAAAGCAG                    |
| <i>pGmZF351-1K-R</i>       | CTTTTTTTTTTTGTGTGTGTGTAG                    |

**Primers for qPCR**

|                            |                              |
|----------------------------|------------------------------|
| <i>GmZF351-qRT-F</i>       | ATGAGTAGTGTTTTTTCAGAACA      |
| <i>GmZF351-qRT-R</i>       | CATCAGCAATTCATTCACC          |
| <i>BCCP2-qRT-F</i>         | GCTCTTCCTCCTTCTCCTACTCC      |
| <i>BCCP2-qRT-R</i>         | GACTTCTCAGCCTCAATCTCGTT      |
| <i>KASIII-qRT-F</i>        | AGAGGTCTTTCGCTTTGCTGTC       |
| <i>KASIII-qRT-R</i>        | ACTTTTCCGCTTCTCACTGCC        |
| <i>TAG1-qRT-F</i>          | CGCAGCAAGATACCAAAGACAC       |
| <i>TAG1-qRT-R</i>          | ACATAATCCCAAGAAAAGCCCA       |
| <i>OLEO2-qRT-F</i>         | GTGATCGGCTTAATGGTTGCTT       |
| <i>OLEO2-qRT-R</i>         | ATTTCTTTGCCCTTTTGTCTG        |
| <i>WRI1-qRT-F</i>          | ACGTACGATCTGGCTGCTCT         |
| <i>WRI1-qRT-R</i>          | CATCTTCCGTTGTGGTGATG         |
| <i>BCCP2-ChIP-F</i>        | GACTGTTGGATTTGTGAAACAA       |
| <i>BCCP2-ChIP-R</i>        | TGTGTTACTGGTCTAATCACCG       |
| <i>KASIII-ChIP-F</i>       | GTGTTAGATGTTTCTATTTACCATATG  |
| <i>KASIII-ChIP-R</i>       | CCGTTTTGTTCAAGTATTAGTT       |
| <i>TAG1-ChIP-F</i>         | TTGACTTATTGAACATGATTACAGA    |
| <i>TAG1-ChIP-R</i>         | ATGTGGTAGTCTTTGATCACTTTTA    |
| <i>OLEO2-ChIP-F</i>        | GATGTTTTCGCTTTCTCCGCT        |
| <i>OLEO2-ChIP-R</i>        | GATCCTTTTAGACTTCGGACTCAA     |
| <i>WRI1-ChIP-F</i>         | AAAACATTCGACAATTTGTTGAAC     |
| <i>WRI1-ChIP-R</i>         | GCATATTTGGCTATTTGCCTATAT     |
| <i>FaTA-ChIP-F</i>         | CTATACACCAACTATGTCGGACGA     |
| <i>FaTA-ChIP-R</i>         | ATTTGCAATGAATGGATTTCTTCT     |
| <i>At3g22960-ChIP-F1-F</i> | ACCAGCATTATCCAAACCAACA       |
| <i>At3g22960-ChIP-F1-R</i> | TGATCTCCGATTCTTACCTCTGC      |
| <i>At3g22960-ChIP-F2-F</i> | CTTAAAGCAGATGGGTGGAGA        |
| <i>At3g22960-ChIP-F2-R</i> | CCCTAAGCCCGTTTGAGTTTT        |
| <i>At3g22960-ChIP-F3-F</i> | TTAGCCACGACGCCAAAGAC         |
| <i>At3g22960-ChIP-F3-R</i> | GATCGTATTATAACCATGATTTCAAATT |
| <i>At3g22960-ChIP-F4-F</i> | TGAAGGCTTGAATGTGAACT         |
| <i>At3g22960-ChIP-F4-R</i> | TTCCAGCTTATCTATTCACCTTAGGA   |
| <i>At3g22960-ChIP-F5-F</i> | TCCTAAGTGAATAGATAAGCTGGAA    |
| <i>At3g22960-ChIP-F5-R</i> | AAATCTCAGGACAGTTGGCTCT       |
| <i>PKpa-qRT-F</i>          | CACACACTCCTCACCTTCTCCAT      |

---

---

|                                     |                                |
|-------------------------------------|--------------------------------|
| <i>PK<math>\alpha</math></i> -qRT-R | GTATCAGTCGTAACCGCCGTAG         |
| <i>PK<math>\beta</math>1</i> -qRT-F | CTGTGCCGTAGTATGGGAAAAG         |
| <i>PK<math>\beta</math>1</i> -qRT-R | CAGCACCTTCTCTAACAGCGAT         |
| <i>Glyma19g03530</i> -qRT-F         | CCAACTCTGCCCCTGTAACGGTCA       |
| <i>Glyma19g03530</i> -qRT-R         | TGCTGGTAGCGGCGAAGACGGA         |
| <i>Glyma18g44350</i> -qRT-F         | TGTTGTTCTTCTTGAAATGGCGA        |
| <i>Glyma18g44350</i> -qRT-R         | CAGCAGAGCCACATCCAATAACT        |
| <i>Glyma09g41380</i> -qRT-F         | ACGCAGTTGCCACTCGGTTAGAA        |
| <i>Glyma09g41380</i> -qRT-R         | GGAAATGTTTAGGGAGTGCTGGAT       |
| <i>Glyma15g00550</i> -qRT-F         | CATCTGGGACTGGGTTCTTCACAC       |
| <i>Glyma15g00550</i> -qRT-R         | TTGGAATCTGTGGAGCAGGGTCTA       |
| <i>Glyma13g16560</i> -qRT-F         | AGTTAGTAAACACGCTCGCTCGGT       |
| <i>Glyma13g16560</i> -qRT-R         | TGACTCTGACGGAAAATGGTGTCCG      |
| <i>Glyma17g06120</i> -qRT-F         | GCAAAACGAAAACAAGACACTGA        |
| <i>Glyma17g06120</i> -qRT-R         | TGGATAGAAAAGCGAAGTTGAGGT       |
| <i>Glyma16g07800</i> -qRT-F         | GGCAGAAGACCAAAGAAGTAGGGCA      |
| <i>Glyma16g07800</i> -qRT-R         | TCGCCTCCACCTTTGCATCCCT         |
| <i>Glyma19g13060</i> -qRT-F         | AAGAGAACAACAGTGACAGCAACA       |
| <i>Glyma19g13060</i> -qRT-R         | TCAACAATGGAAGTGAACAAATAC       |
| <i>Glyma08g24420</i> -qRT-F         | TCATCCACTTCCTCTGTTGGGT         |
| <i>Glyma08g24420</i> -qRT-R         | TTTACCCTTCTTGCTCTGAATGTT       |
| <i>Glyma15g34770</i> -qRT-F         | GTCTCCAGCATCTTCTTGTTTCATC      |
| <i>Glyma15g34770</i> -qRT-R         | TCCTTGGTATAAGTTTCTATCGGG       |
| <i>GUS</i> -qRT-F                   | AATGTAATGTTCTGCGACGCTCAC       |
| <i>GUS</i> -qRT-R                   | TATTCGGTGATGATAATCGGCTGA       |
| <i>AtActin2</i> -qRT-F              | ATGCCCAGAAGTCTTGTTCC           |
| <i>AtActin2</i> -qRT-R              | TGCTCATACGGTCAGCGATA           |
| <i>GmTUBULIN</i> -qRT-F             | TGGCCGTTACCTGACAGCAT           |
| <i>GmTUBULIN</i> -qRT-R             | CTCGGAGGGATGTCACACAC           |
| <i>ZF351</i> -Heterozygote-F        | CAATAAATAAATTTTAAAAGCAG        |
| <i>ZF351</i> -Heterozygote-R        | TCAGTTTCACATAGTTTGGTTG         |
| <i>ZF351</i> -TaqMan-F              | TCAAGAAATCCCTCGGAGACA          |
| <i>ZF351</i> -TaqMan-R              | CGCCATCGGAGTCATCGT             |
| <i>GmTUBULIN</i> -TaqMan-F          | GGAAAGATGAGCACCAAGGAAGT        |
| <i>GmTUBULIN</i> -TaqMan-R          | TGGGAATCCACTCAACGAAGT          |
| <i>GmZF351</i> -Probe               | CCGGCGACACTTATCTGCCTCAC        |
| <i>GsZF351</i> -Probe               | CCGGCGACATTTATCTGCCTCAC        |
| <i>GmTUBULIN</i> -Probe             | ATGATCAACGTGCAGAACAAGAACTCGTCC |

---
